# Supplementary material for: The effect of sulfate half-ester groups on cellulose nanocrystal periodate oxidation
Source: Springer Nature journal article supplement (doi:10.1007/s10570-021-04115-y), 2021-08-17
Supplement: MOESM1 [file 19577796]

## Supplementary Information file for

### The effect of sulfate half-ester groups on cellulose nanocrystal periodate oxidation

Saül Llàcer Navarro · Koyuru Nakayama · Alexander Idström · Lars

Evenäs · Anna Ström · Tiina Nypelö\*

S. Llàcer Navarro, K. Nakayama, A. Idström, L. Evenäs, A. Ström, T. Nypelö  
Department of Chemistry and Chemical Engineering, Chalmers University of Technology,  
41296 Gothenburg, Sweden

S. Llàcer Navarro, K. Nakayama, L. Evenäs, T. Nypelö  
WallenbergWood Science Center, Chalmers University of Technology, 41296 Gothenburg, Sweden

\*Corresponding author email: [tiina.nypelo@chalmers.se](mailto:tiina.nypelo@chalmers.se)

#### Nuclear Magnetic Resonance Spectroscopy

Table S1. Results of spectral fitting for the C1, C4 and oxidized compounds region of CP/MAS <sup>13</sup>C NMR spectrum of cellulose (cf. Figure 5).

|                    | Assignment         | d (ppm) | FWHM (Hz) |
|--------------------|--------------------|---------|-----------|
| C1                 | Crystalline        | 108.4   | 243       |
|                    | Crystalline        | 106.1   | 248       |
|                    | Crystalline        | 105.3   | 175       |
|                    | Crystalline        | 104.8   | 316       |
|                    | Crystalline        | 104.2   | 177       |
|                    | Non-Crystalline    | 102.1   | 255       |
|                    | Cellulose oligomer | 100.5   | 255       |
|                    | Oxidized compounds | 103.1   | 323       |
|                    | Oxidized compounds | 99.8    | 273       |
|                    | Oxidized compounds | 97.6    | 307       |
| C4                 | Oxidized compounds | 94.9    | 321       |
|                    | Oxidized compounds | 91.0    | 429       |
|                    | Crystalline        | 89.2    | 91        |
|                    | Crystalline        | 88.7    | 87        |
|                    | Crystalline        | 88.2    | 316       |
|                    | Crystalline        | 87.9    | 122       |
|                    | Amorphous          | 84.2    | 209       |
|                    | Amorphous          | 83.4    | 464       |
|                    | Amorphous          | 82.7    | 159       |
|                    | Cellulose oligomer | 80.9    | 198       |
| Cellulose oligomer | 79.3               | 174     |           |

## Elemental analysis

The sulfate content of the CNCs was higher previous to oxidation than the sodium content indicating that not all sulfate half-ester groups were in Na<sup>+</sup> form. The Na/S ratio increased with oxidation indicating that the use of the sodium periodate facilitated a cation exchange of the remaining sulfate groups. However, it could also be a result of decreasing sulfate group content or that the oxidation results in other functionalities than aldehydes only.

Table S2. Elemental analysis of CNCs with various degree of oxidation (DO) expressed as wt%. The standard deviation was less than 0.02 in all cases.

| Derivate                | S    | H    | O     | Na   | Na/S | O/S    |
|-------------------------|------|------|-------|------|------|--------|
| <b>CNC</b>              | 1.09 | 5.60 | 52.20 | 0.39 | 0.35 | 48.11  |
| <b>DAC DO 11%</b>       | 0.71 | 5.92 |       |      |      |        |
| <b>DAC DO 27%</b>       | 0.69 | 5.85 |       |      |      |        |
| <b>DAC DO 52%</b>       | 0.66 | 5.65 | 54.78 | 0.51 | 0.77 | 82.99  |
| <b>desulfCNC</b>        | 0.29 | 6.04 | 52.42 |      |      | 183.93 |
| <b>desulfDAC DO 11%</b> | 0.30 | 5.85 |       |      |      |        |
| <b>desulfDAC DO 32%</b> | 0.26 | 5.60 |       |      |      |        |
| <b>desulfDAC DO 48%</b> | 0.24 | 5.79 | 53.84 |      |      | 229.09 |

Table S3. Bonferroni-Holm test comparing the dimensions of the CNC derivatives. Each row represents a comparison between derivate 1 and derivate 2. The p-value and the corrected alpha (rejection criteria) for each individual hypotheses to avoid family-wise error are included. If the p-value is smaller than the corrected alpha the difference is statistically significant.

| Derivate 1       | Derivate 2       | p-value  | Alpha | Difference |
|------------------|------------------|----------|-------|------------|
| <b>CNC</b>       | <b>DAC</b>       | 2.79E-10 | 0.01  | YES        |
| <b>CNC</b>       | <b>desulfCNC</b> | 0.42     | 0.05  | NO         |
| <b>desulfCNC</b> | <b>desulfDAC</b> | 0.02     | 0.02  | NO         |
| <b>DAC</b>       | <b>desulfDAC</b> | 1.07E-11 | 0.01  | YES        |
| <b>CNC</b>       | <b>desulfDAC</b> | 0.10     | 0.03  | NO         |
| <b>DAC</b>       | <b>desulfCNC</b> | 1.55E-8  | 0.01  | YES        |
